# Supplementary material
Source: MDPI journal article supplement (https://www.mdpi.com/2073-4395/13/1/145)
Supplement: s1 [file s1]

**Table S1.** Correlation matrix with the Pearson coefficient values for all the measured traits in turnip greens microgreens.

|                       | FY | DY       | Height   | FW        | % DM     | Chl <i>a</i> | Chl <i>b</i> | Chl <i>a+b</i> | Car      | Chl <i>a/b</i> | Chl/Car  | AscA     | TPC      | DPPH     | Nitrate  | Sugars   |
|-----------------------|----|----------|----------|-----------|----------|--------------|--------------|----------------|----------|----------------|----------|----------|----------|----------|----------|----------|
| <b>FY</b>             | -  | 0.904*** | 0.188ns  | 0.260ns   | -0.308ns | 0.627*       | 0.442ns      | 0.561*         | 0.702*   | -0.122ns       | 0.555ns  | 0.373ns  | -0.366ns | -0.084ns | 0.0164ns | 0.404ns  |
| <b>DY</b>             |    | -        | -0.106ns | 0.310ns   | 0.127ns  | 0.461ns      | 0.271ns      | 0.390ns        | 0.584*   | 0.0649ns       | 0.286ns  | 0.329ns  | -0.053ns | 0.157ns  | 0.0694ns | 0.207ns  |
| <b>Height</b>         |    |          | -        | -0.0716ns | -0.674*  | 0.316ns      | 0.298ns      | 0.315ns        | 0.297ns  | -0.292ns       | 0.328ns  | 0.571ns  | -0.756** | -0.626*  | -0.397ns | 0.480ns  |
| <b>FW</b>             |    |          |          | -         | 0.0671ns | -0.014ns     | -0.093ns     | -0.0478ns      | 0.143ns  | 0.240ns        | -0.232ns | -0.028ns | 0.322ns  | 0.471ns  | -0.040ns | -0.372ns |
| <b>% DM</b>           |    |          |          |           | -        | -0.417ns     | -0.399ns     | -0.417ns       | -0.338ns | 0.394ns        | -0.602*  | -0.122ns | 0.722**  | 0.495ns  | 0.130ns  | -0.460ns |
| <b>Chl <i>a</i></b>   |    |          |          |           |          | -            | 0.922***     | 0.987***       | 0.810**  | -0.676*        | 0.594*   | 0.302ns  | -0.577*  | -0.244ns | 0.155ns  | 0.303ns  |
| <b>Chl <i>b</i></b>   |    |          |          |           |          |              | -            | 0.973***       | 0.522ns  | -0.891***      | 0.610*   | 0.374ns  | -0.535ns | -0.391ns | 0.226ns  | 0.336ns  |
| <b>Chl <i>a+b</i></b> |    |          |          |           |          |              |              | -              | 0.704*   | -0.780**       | 0.612*   | 0.338ns  | -0.571ns | -0.311ns | 0.188ns  | 0.323ns  |
| <b>Car</b>            |    |          |          |           |          |              |              |                | -        | -0.145ns       | 0.362ns  | 0.130ns  | -0.486ns | 0.0469ns | -0.018ns | 0.156ns  |
| <b>Chl <i>a/b</i></b> |    |          |          |           |          |              |              |                |          | -              | -0.610*  | -0.351ns | 0.442ns  | 0.551ns  | -0.174ns | -0.335ns |
| <b>Chl/Car</b>        |    |          |          |           |          |              |              |                |          |                | -        | 0.227ns  | -0.590*  | -0.581*  | -0.048ns | 0.697*   |
| <b>AscA</b>           |    |          |          |           |          |              |              |                |          |                |          | -        | -0.545ns | -0.620*  | 0.133ns  | 0.495ns  |
| <b>TPC</b>            |    |          |          |           |          |              |              |                |          |                |          |          | -        | 0.680*   | -0.063ns | -0.730** |
| <b>DPPH</b>           |    |          |          |           |          |              |              |                |          |                |          |          |          | -        | -0.139ns | -0.583*  |
| <b>Nitrate</b>        |    |          |          |           |          |              |              |                |          |                |          |          |          |          | -        | -0.111ns |
| <b>Sugars</b>         |    |          |          |           |          |              |              |                |          |                |          |          |          |          |          | -        |

FY = fresh yield; DY = dry yield; Height = seedling height; FW = seedling fresh weight; %DM = dry matter percentage; Chl *a* = chlorophyll *a*; Chl *b* = chlorophyll *b*; Chl *a+b* = total chlorophyll; Car = carotenoids; AscA = ascorbic acid; TPC = total phenol compound. Statistical significance at 0.001 (\*\*\*), 0.01 level (\*\*), 0.05 level (\*), or not significant (ns) bilateral, using Pearson correlation test in SigmaPlot. Signalling (-) reveals the negative relation between parameters or in its absence, their positive correlation.

**Table S2.** Correlation matrix with the Pearson coefficient values for all the measured traits in radish microgreens.

|                       | FY | DY       | Height   | FW       | % DM      | Chl <i>a</i> | Chl <i>b</i> | Chl <i>a+b</i> | Car      | Chl <i>a/b</i> | Chl/Car   | AscA      | TPC      | DPPH     | Nitrate   | Sugars    |
|-----------------------|----|----------|----------|----------|-----------|--------------|--------------|----------------|----------|----------------|-----------|-----------|----------|----------|-----------|-----------|
| <b>FY</b>             | -  | 0.905*** | -0.180ns | 0.769**  | -0.789**  | 0.487ns      | 0.371ns      | 0.449ns        | 0.499ns  | -0.051ns       | 0.397ns   | -0.743**  | 0.321ns  | 0.166ns  | -0.863*** | -0.502ns  |
| <b>DY</b>             |    | -        | -0.239ns | 0.511ns  | -0.461ns  | 0.311ns      | 0.193ns      | 0.271ns        | 0.288ns  | 0.110ns        | 0.239ns   | -0.594*   | 0.119ns  | -0.023ns | -0.839*** | -0.399ns  |
| <b>Height</b>         |    |          | -        | -0.126ns | 0.018ns   | 0.208ns      | 0.279ns      | 0.235ns        | 0.325ns  | -0.428ns       | 0.193ns   | 0.017ns   | 0.065ns  | 0.171ns  | 0.119ns   | -0.164ns  |
| <b>FW</b>             |    |          |          | -        | -0.861*** | 0.262ns      | 0.220ns      | 0.249ns        | 0.260ns  | -0.120ns       | 0.216ns   | -0.524ns  | 0.37ns   | 0.121ns  | -0.604*   | -0.197ns  |
| <b>% DM</b>           |    |          |          |          | -         | -0.587*      | -0.503ns     | -0.561ns       | -0.640*  | 0.254ns        | -0.497ns  | 0.761**   | -0.550ns | -0.451ns | 0.672**   | 0.552ns   |
| <b>Chl <i>a</i></b>   |    |          |          |          |           | -            | 0.970***     | 0.996*         | 0.932*** | -0.668*        | 0.978***  | -0.772*** | 0.576*   | 0.419ns  | -0.453ns  | -0.851*** |
| <b>Chl <i>b</i></b>   |    |          |          |          |           |              | -            | 0.988***       | 0.853*** | -0.823***      | 0.993***  | -0.670*   | 0.590*   | 0.426ns  | -0.326ns  | -0.801*** |
| <b>Chl <i>a+b</i></b> |    |          |          |          |           |              |              | -              | 0.910*** | -0.728***      | 0.990***  | -0.741*** | 0.585*   | 0.424ns  | -0.411ns  | -0.839*** |
| <b>Car</b>            |    |          |          |          |           |              |              |                | -        | -0.478ns       | 0.845***  | -0.738**  | 0.442ns  | 0.396ns  | -0.427ns  | -0.775**  |
| <b>Chl <i>a/b</i></b> |    |          |          |          |           |              |              |                |          | -              | -0.778*** | 0.309ns   | -0.564ns | -0.404ns | 0.020ns   | 0.533ns   |
| <b>Chl/Car</b>        |    |          |          |          |           |              |              |                |          |                | -         | -0.700*   | 0.600*   | 0.407ns  | -0.372ns  | -0.819**  |
| <b>AscA</b>           |    |          |          |          |           |              |              |                |          |                |           | -         | -0.572ns | -0.542ns | 0.786**   | 0.855***  |
| <b>TPC</b>            |    |          |          |          |           |              |              |                |          |                |           |           | -        | 0.733**  | -0.559*   | -0.710**  |
| <b>DPPH</b>           |    |          |          |          |           |              |              |                |          |                |           |           |          | -        | -0.347ns  | -0.722**  |
| <b>Nitrate</b>        |    |          |          |          |           |              |              |                |          |                |           |           |          |          | -         | 0.649*    |
| <b>Sugars</b>         |    |          |          |          |           |              |              |                |          |                |           |           |          |          |           | -         |

FY = fresh yield; DY = dry yield; Height = seedling height; FW = seedling fresh weight; %DM = dry matter percentage; Chl *a* = chlorophyll *a*; Chl *b* = chlorophyll *b*; Chl *a+b* = total chlorophyll; Car = carotenoids; AscA = ascorbic acid; TPC = total phenol compound. Statistical significance at 0.001 (\*\*\*), 0.01 level (\*\*), 0.05 level (\*), or not significant (ns) bilateral, using Pearson correlation test in SigmaPlot. Signalling (-) reveals the negative relation between parameters or in its absence, their positive correlation.
